# Supplementary material for: Comparative Lipidome and Transcriptome Provide Novel Insight Into Polyunsaturated Fatty Acids Metabolism of the Sea Urchin
Source: Frontiers journal article supplement (doi:10.3389/fmars.2022.777341), 2022-04-27
Supplement: Data_Sheet_1.DOCX [file Data_Sheet_1.DOCX]

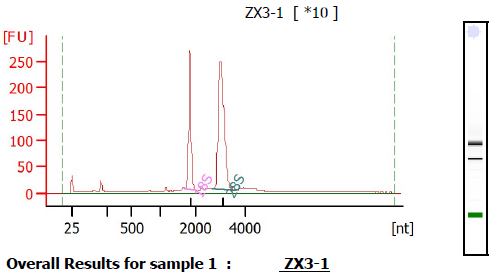

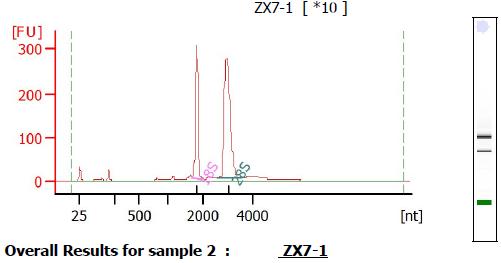


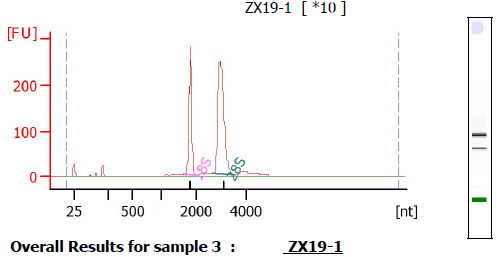

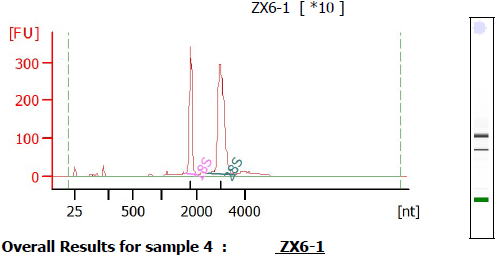


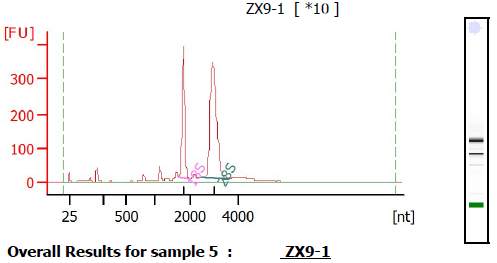

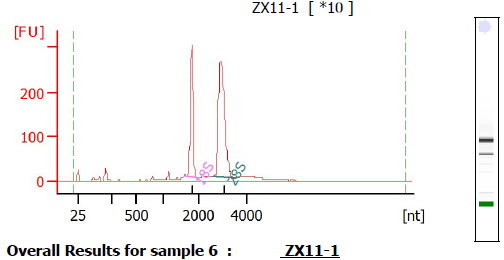


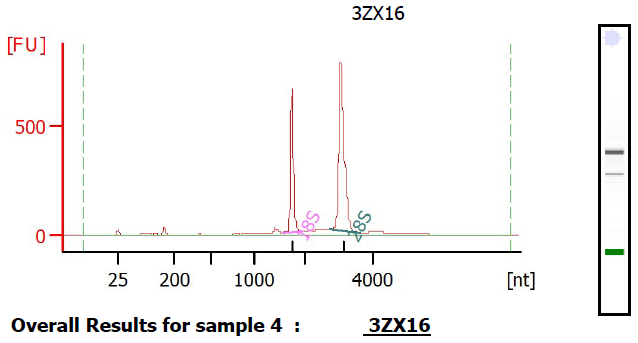

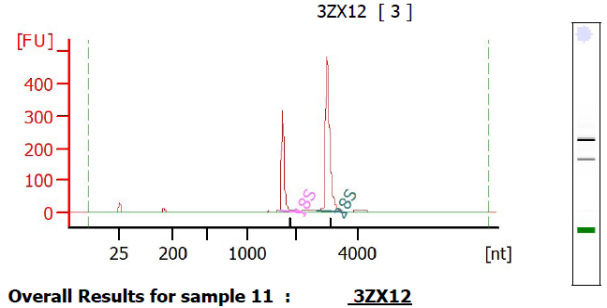

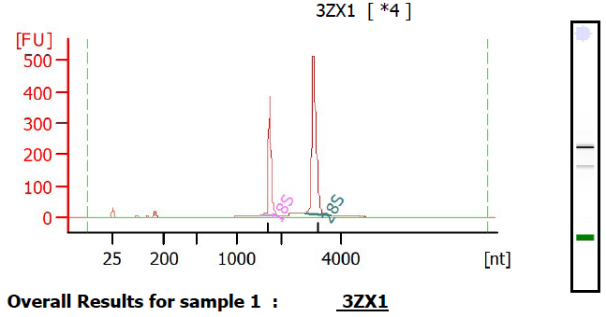

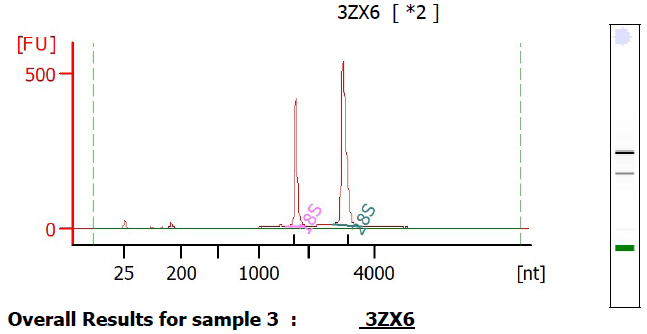


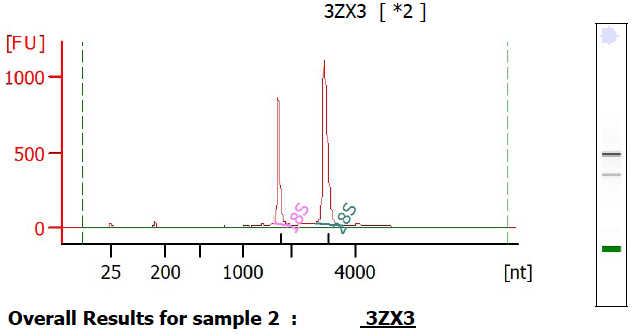

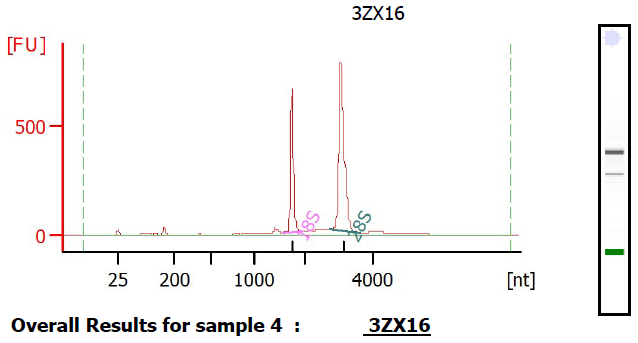


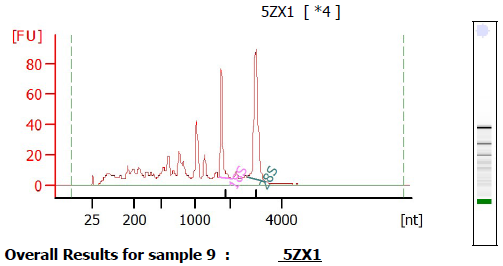

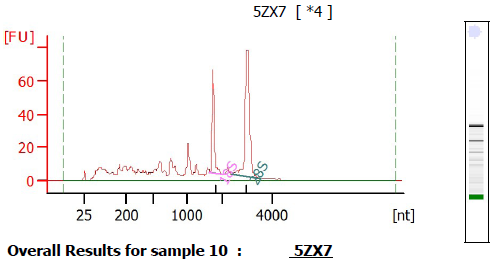

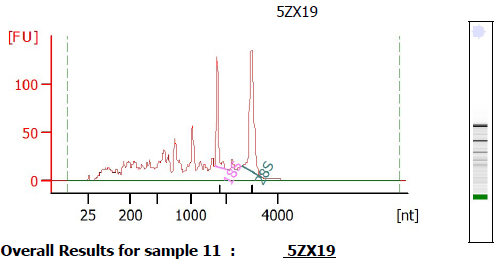

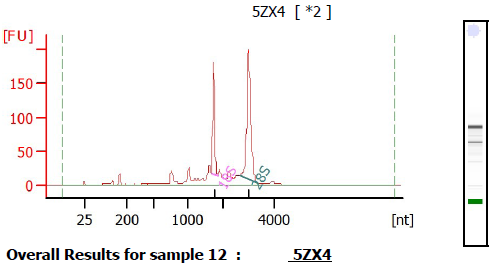

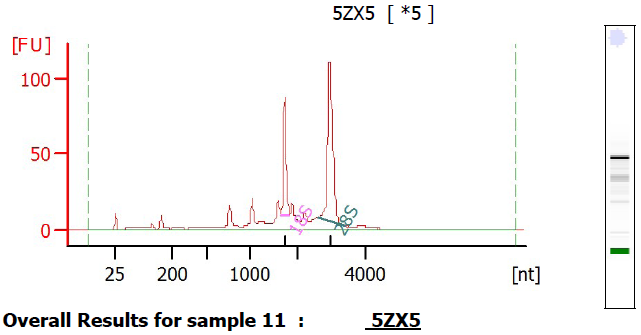

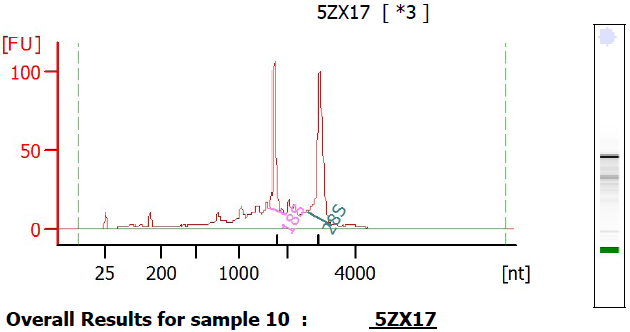


SupplementaryFIGURE S1. The results of RNA quality check for transcriptome.

(A)
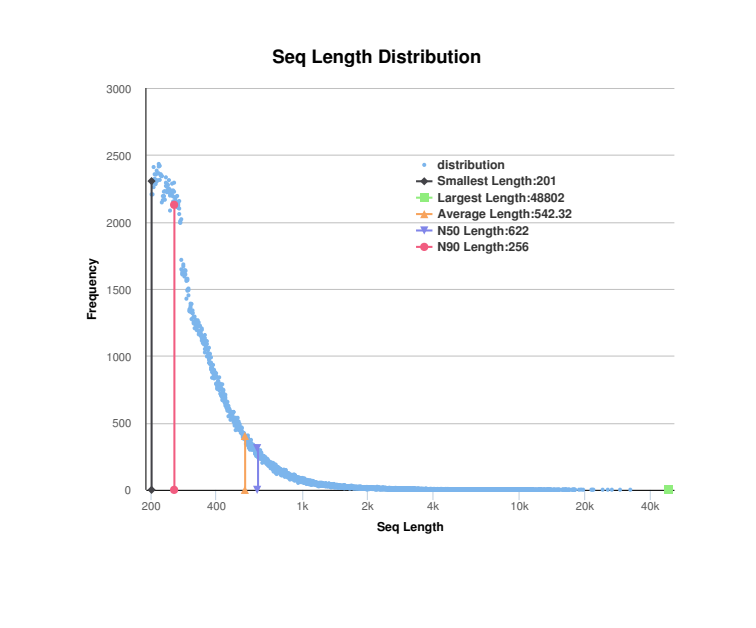


(B)
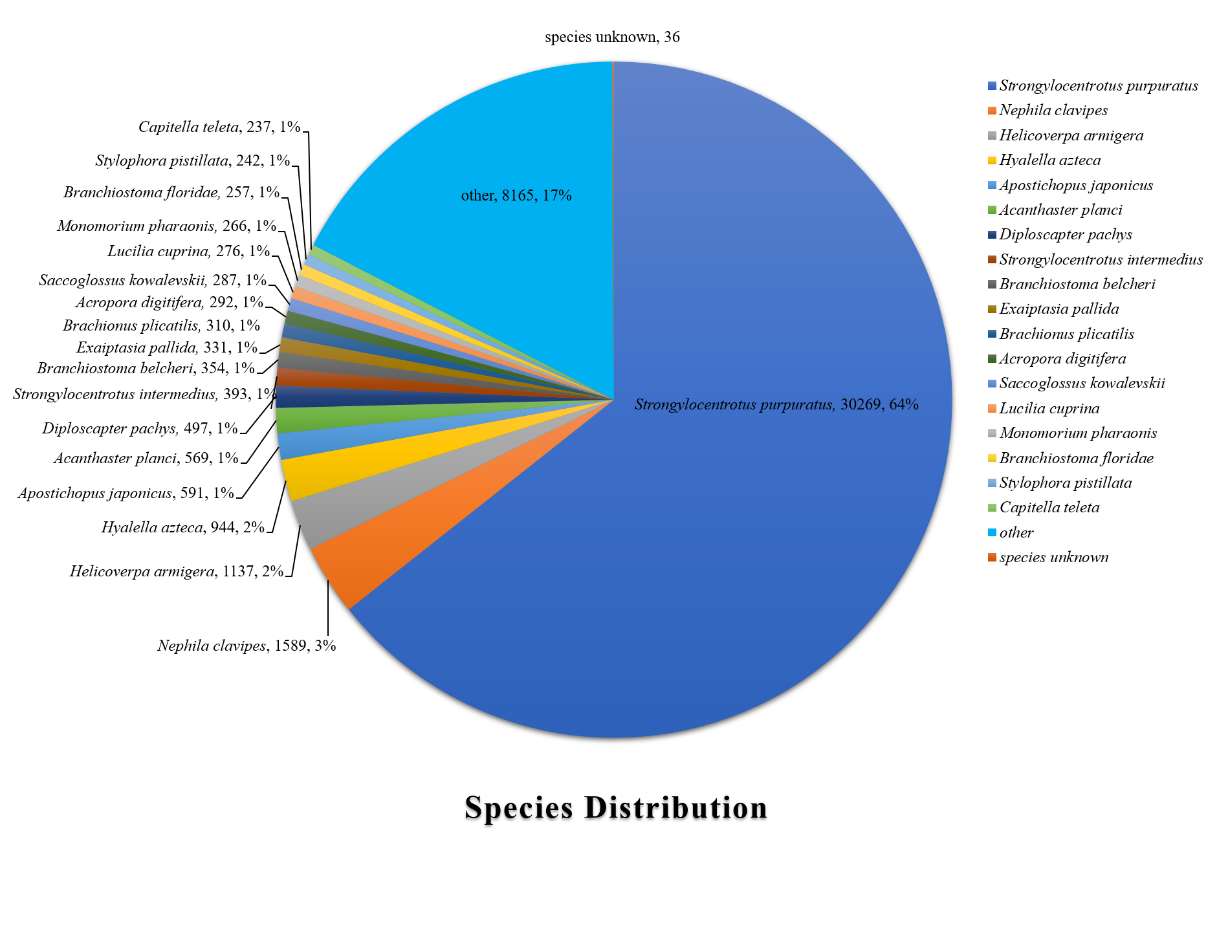


SupplementaryFIGURE S2**.** Sequence length distribution of the unigenes(A) and top-hit species distribution of BlastX matches obtained against the NCBI non-redundant (NR) protein database (B).
