# Supplementary material for: Comparative Lipidome and Transcriptome Provide Novel Insight Into Polyunsaturated Fatty Acids Metabolism of the Sea Urchin
Source: Frontiers journal article supplement (doi:10.3389/fmars.2022.777341), 2022-04-27
Supplement: Table_1.XLSX [file Table_1.XLSX]

## Sheet: Suppl.Table1
Supplementary Table S1. The results of RNA quality check for transcriptome.
Sample ID	Sample Detail Description	Conc. (µg/µL)	O.D. 260/280	O.D. 260/230	Amount (µg)	rRNA 28S/18S	RIN	QC Evaluation
ZX3-1	Gonad-HF1	1.64	1.87	1.79	54.02	2	9.9	A
ZX7-1	Gonad-HF2	1.75	1.61	1.51	57.63	2	9.8	A
ZX19-1	Gonad-HF3	1.74	1.63	1.55	57.52	1.9	9.9	A
ZX6-1	Gonad-HM1	1.76	1.53	1.44	58.21	2	9.8	A
ZX9-1	Gonad-HM2	1.8	1.2	1.11	59.29	2	9.6	A
ZX11-1	Gonad-HM3	1.77	1.43	1.3	58.5	2	9.7	A
3ZX1	Gonad-MF1	0.76	2.2	2.23	32.47	2.1	10	A
3ZX6	Gonad-MF2	0.4	2.19	2.22	17.19	2	10	A
3ZX16	Gonad-MF3	0.29	2.17	2.14	12.37	1.9	10	A
3ZX3	Gonad-MM1	0.51	2.18	2.23	22.07	2.1	10	A
3ZX9	Gonad-MM2	0.35	2.17	2.13	14.99	1.8	10	A
3ZX12	Gonad-MM3	0.65	2.19	2.22	28.06	2.2	10	A
5ZX1	Gonad-LF1	0.9	2.19	2.13	28.83	1.9	6.5	A
5ZX7	Gonad-LF2	0.84	2.2	2.08	26.87	2	6.9	A
5ZX19	Gonad-LF3	0.3	2.17	1.56	9.55	1.8	6.1	A
5ZX4	Gonad-LM1	0.47	2.2	1.95	15.15	2.1	8.3	A
5ZX5	Gonad-LM2	1.05	2.21	2.09	33.47	2.4	8	A
5ZX17	Gonad-LM3	0.75	2.19	2.15	24.08	1.7	7.2	A

## Sheet: Suppl.Table2
Supplementary Table S2. The primers used in this research
Primer	Sequence from 5’ to 3’
18S rRNA-F	TGAGCCGCAACAGTAATC
18S rRNA-R	AAGGGAAAAGGAAGTGAAAG
Accsl-F	CTACCAGACAAGAGCAGGACGCACG
Accsl-R	CAGATTCTTGGGTTGCGTTGGGGAT
Ank3-F	TAATACTCCCCCTGTTGGCTGTC
Ank3-R	TTACGATGAATGACGATGTGCCT
Arhgef3-F	GCTCCATCCATCTCGTCTCG
Arhgef3-R	CCCGTCAACACGAAGCAGAT
Arhgef28-F	TATGTGCTTTCAAGTTTCACCCAG
Arhgef28-R	GCATGTGGCTGCCTCTGTG
Btrc-F	TGAACAACCCTCAACTCCAGCAGA
Btrc-R	TTTTTCCTTCGTCTCCTCCCTTCT
Celf2-F	TTTTCGTAGTGTCTTTCGCTTCG
Celf2-R	CACAAACCTGGTGGTGGATAAGC
Grb2-F	CCCTGACTCATCCTCATCCCATT
Grb2-R	CACTACAGACCTCACTTTCCTTGCT
Kcmf1-F	TGTGAGTGCCCGCTATTCTTGG
Kcmf1-R	TGTAACGATTGAGGCGAGTAA
RPSA-F	GGGGCTCCGTTGATGCTC
RPSA-R	TGTGGGTGATGAAATGGG
SND1-F	TGCCACTGTCTTGCGACTCCT
SND1-R	GTGATGACCAACGGACCAGAA
Srpk2-F	TTATGGGTTGACTGAAAGTGGCTA
Srpk2-R	TTTACTGTGTATTTCTGTGTGCTG
Note: “F” represented forward primer, and “R” represented reverse primer.

## Sheet: Suppl.Table3
Supplementary Table S3. Summary of the transcriptome assembly of Strongylocentrotus intermedius
Type	Total sequence number	Total base	Percent GC %	Largest	Smallest	Average	N50	N90
unigene	527806	286240412	39.64	48802	201	542.32	622	256
transcripts	969625	710978306	39.57	48802	174	733.25	1149	296

## Sheet: Suppl.Table4
Supplementary Table S4. Statistics result of gene annotation
Type	unigene	transcript
GO	23503	49113
KEGG	16246	36098
NR	47042	107765
PFAM	15551	43307
STRING	11552	14329
SWISSPROT	24032	50463

## Sheet: Suppl.Table5
Supplementary Table S5. List of all differentially expressed genes ( False Discovery Rate – corrected (FDR) p-value < 0.05 and log2|fold change| ≥ 2) with blast annotations.
Group	Sequence ID	Gene annotation	abbreviation	identify	expression_H	expression_L	log2FC(H/L)	pval	fdr	regulate	significant	tpm_HF1	tpm_HF2	tpm_HF3	tpm_HM1	tpm_HM2	tpm_HM3	tpm_LF1	tpm_LF2	tpm_LF3	tpm_LM1	tpm_LM2	tpm_LM3
H vs L	TRINITY_DN1910_c1_g1	WD repeat-containing protein 78 [Strongylocentrotus purpuratus]	WDR78	0.982	14.4446	0	10.4973	1.78079e-08	0.000722327	up	yes	0.907648	1.59234	0.09483	24.1464	44.254	15.6721	0	0	0	0	0	0
	TRINITY_DN1066_c0_g1	tudor domain-containing protein 3 [Strongylocentrotus purpuratus]	TDRD3	0.9367	3.27716	0	8.3607	2.38191e-08	0.000722327	up	yes	2.11896	2.48582	0.964497	2.84883	7.01332	4.23156	0	0	0	0	0	0
	TRINITY_DN1854_c0_g1	SRSF protein kinase 3 isoform X1 [Strongylocentrotus purpuratus]	SRPK3	0.9306	2.74176	0	8.10421	2.26311e-07	0.0034315	up	yes	2.32425	1.28507	1.58591	4.82043	6.36627	0.068643	0	0	0	0	0	0
	TRINITY_DN9924_c0_g1	rho guanine nucleotide exchange factor 3 isoform X1 [Strongylocentrotus purpuratus]	ARHGEF3	0.9655	3.63686	0	8.51051	1.54468e-06	0.0156144	up	yes	2.30328	1.73647	3.34819	7.23427	7.19894	0	0	0	0	0	0	0
	TRINITY_DN6340_c2_g1	bromodomain adjacent to zinc finger domain protein 2B isoform X2 [Strongylocentrotus purpuratus]	BAZ2B	0.9443	3.04498	0	8.25502	1.83637e-06	0.0159111	up	yes	4.13368	5.6211	3.07635	2.88651	2.55227	0	0	0	0	0	0	0
	TRINITY_DN40850_c0_g1	40S ribosomal protein SA [Strongylocentrotus purpuratus]	RPSA	0.9242	395.767	0.263553	10.4987	4.35752e-06	0.0280927	up	yes	23.6717	1648.75	0.287482	0.424672	327.899	373.573	0.553619	0.267002	0	0.56291	0.197785	0
	TRINITY_DN7494_c0_g2	paired box protein [Strongylocentrotus purpuratus]	PAX	0.9535	1.30415	0	7.03798	4.67118e-06	0.0280927	up	yes	2.20041	1.41297	3.11601	0.3782	0.311857	0.405433	0	0	0	0	0	0
	TRINITY_DN5412_c0_g1	uncharacterized protein LOC582810 isoform X1 [Strongylocentrotus purpuratus]	LOC582810	0.971	6.22945	0	9.28527	5.09506e-06	0.0280927	up	yes	4.03864	2.00394	0	6.30787	3.59922	21.427	0	0	0	0	0	0
	TRINITY_DN1495_c0_g1	uncharacterized protein LOC100890930 [Strongylocentrotus purpuratus]	LOC100890930	0.8793	3.43221	0	8.42719	1.18614e-05	0.0449627	up	yes	3.51002	2.78519	0	5.82507	8.47299	0	0	0	0	0	0	0
	TRINITY_DN6252_c0_g1	probable inactive 1-aminocyclopropane-1-carboxylate synthase-like protein 2 [Strongylocentrotus purpuratus]	ACCSL	0.9674	0	27.9021	-11.4467	4.26331e-08	0.000861914	down	yes	0	0	0	0	0	0	0.114595	2.31839	4.25876	97.2035	29.4603	34.0569
	TRINITY_DN6169_c0_g1	E3 ubiquitin-protein ligase KCMF1 [Strongylocentrotus purpuratus]	KCMF1	0.9975	0	3.55362	-8.4772	3.92299e-07	0.00475866	down	yes	0	0	0	0	0	0	0.222113	2.30427	3.36435	7.77657	2.79623	4.85819
	TRINITY_DN7542_c13_g1	ankyrin-3-like [Strongylocentrotus purpuratus]	ANK3	0.8274	0	19.1738	-10.9057	3.98193e-06	0.0280927	down	yes	0	0	0	0	0	0	2.63813	0	0	31.7179	27.1078	53.5792
	TRINITY_DN3341_c0_g1	RNA-binding protein 26 [Strongylocentrotus purpuratus]	RBM26	0.9761	0	2.15674	-7.75938	6.43276e-06	0.0325128	down	yes	0	0	0	0	0	0	0.863013	0.411684	0.932746	7.93693	0	2.79605
	TRINITY_DN2389_c1_g1	growth factor receptor-bound protein 2 isoform X2 [Strongylocentrotus purpuratus]	GRB2	0.6579	0.00876067	7.84488	-8.70973	7.1673e-06	0.0334387	down	yes	0.052564	0	0	0	0	0	1.70943	2.39997	0.060069	12.2445	11.2976	19.3577
	TRINITY_DN7134_c1_g1	PREDICTED: Strongylocentrotus purpuratus uncharacterized LOC587777	LOC587777	0.9549	0	10.7235	-10.0679	7.91658e-06	0.0342963	down	yes	0	0	0	0	0	0	21.8525	23.7399	0	5.30589	9.47997	3.96269
	TRINITY_DN18428_c2_g1	40S ribosomal protein S17 [Strongylocentrotus purpuratus]	RPS17	1	0	200.156	-14.2889	1.1428e-05	0.0449627	down	yes	0	0	0	0	0	0	1.80162	845.366	0	207.344	0	146.427
H vs M	TRINITY_DN648_c0_g1	EF-hand calcium-binding domain-containing protein 5 isoform X4 [Strongylocentrotus purpuratus]	EFCAB5	0.9423	3.56086	0	8.48013	2.03571e-08	0.00135543	up	yes	0.310479	0.816181	2.17909	4.77235	9.0689	4.21813	0	0	0	0	0	0
	TRINITY_DN1626_c1_g1	dynein heavy chain 3, axonemal isoform X2 [Strongylocentrotus purpuratus]	DNAH3	0.9946	10.9912	3.33333e-06	10.103	3.09332e-07	0.00686541	up	yes	4e-06	0.605829	0.567989	31.2644	29.7242	3.78473	4e-06	3e-06	3e-06	4e-06	3e-06	3e-06
	TRINITY_DN8836_c0_g1	PREDICTED: Strongylocentrotus purpuratus autophagy protein 12-like (LOC582719)	ATG12	0.8771	5.99209	0	9.22932	1.12157e-06	0.0149355	up	yes	7.75199	10.8653	0.234762	9.45758	6.84514	0.797733	0	0	0	0	0	0
	TRINITY_DN9924_c0_g1	rho guanine nucleotide exchange factor 3 isoform X1 [Strongylocentrotus purpuratus]	ARHGEF3	0.9655	3.63686	0	8.51051	1.3512e-06	0.0149945	up	yes	2.30328	1.73647	3.34819	7.23427	7.19894	0	0	0	0	0	0	0
	TRINITY_DN57915_c0_g1	40S ribosomal protein S15-like [Strongylocentrotus purpuratus]	RPS15	1	0.220224	409.325	-10.796	2.66062e-07	0.00686541	down	yes	0	0.171557	0	0	1.14979	0	819.401	515.827	509.807	458.071	1.14394	151.7
	TRINITY_DN3678_c0_g1	PREDICTED: Strongylocentrotus purpuratus uncharacterized LOC579112	LOC579112	0.9549	0	5.56777	-9.12354	7.13471e-07	0.0118763	down	yes	0	0	0	0	0	0	1.60528	2.56392	2.35725	17.0953	3.83715	5.94768
M vs L	TRINITY_DN166_c0_g1	uncharacterized protein LOC100887999 [Strongylocentrotus purpuratus]	LOC100887999	0.9114	1.95219	0	7.61632	2.35086e-08	0.00156673	up	yes	2.59071	1.69326	2.81228	0.511792	1.34179	2.76333	0	0	0	0	0	0
	TRINITY_DN56_c0_g2	F-box/LRR-repeat protein 7 [Strongylocentrotus purpuratus]	FBXL7	0.9917	1.71332	0	7.42905	2.23992e-07	0.00746397	up	yes	1.82082	3.77421	0.087149	1.305	1.65866	1.63406	0	0	0	0	0	0
	TRINITY_DN20557_c0_g2	RING finger and transmembrane domain-containing protein 2 [Strongylocentrotus purpuratus]	RNFT2	0.9872	1.74415	0	7.45463	2.93564e-06	0.0280338	up	yes	1.59274	2.21901	0.61433	0.927847	0.491625	4.61933	0	0	0	0	0	0
	TRINITY_DN10799_c0_g1	PREDICTED: Strongylocentrotus purpuratus plexin-A4 (LOC578743)	PLXNA4	0.8692	3.20045	0	8.32663	4.20643e-06	0.0280338	up	yes	2.12779	7.74341	0	2.5874	5.65113	1.09294	0	0	0	0	0	0
	TRINITY_DN1626_c1_g1	dynein heavy chain 3, axonemal isoform X2 [Strongylocentrotus purpuratus]	DNAH3	0.9946	3.33333e-06	6.78221	-9.40726	4.83542e-07	0.00967883	down	yes	4e-06	3e-06	3e-06	4e-06	3e-06	3e-06	0.579892	4e-06	0.37848	7.8816	5.9331	25.9202
	TRINITY_DN1107_c0_g1	PREDICTED: Strongylocentrotus purpuratus exonuclease 1 (LOC762697)	EXO1	0.9474	0	87.6439	-13.0976	5.80918e-07	0.00967883	down	yes	0	0	0	0	0	0	160.142	185.09	0	54.7287	89.3972	36.5059
	TRINITY_DN4207_c0_g1	putative uncharacterized protein DDB_G0271606 [Acanthaster planci]	G0271606	0.4355	0	98.8145	-13.2707	1.32667e-06	0.0176832	down	yes	0	0	0	0	0	0	0.121008	0	0.113691	42.4812	380.443	169.729
	TRINITY_DN4324_c0_g2	uncharacterized protein	UN	--	0	8.079	-9.65982	3.32495e-06	0.0280338	down	yes	0	0	0	0	0	0	2.69188	7.21107	0	13.3795	21.8737	3.3179
	TRINITY_DN5227_c0_g1	dihydrofolate reductase [Strongylocentrotus purpuratus]	DHFR	0.9735	0	4.72085	-8.88596	3.5404e-06	0.0280338	down	yes	0	0	0	0	0	0	5.88357	10.3899	0	2.76024	7.49071	1.80067
	TRINITY_DN3310_c0_g1	PREDICTED: Strongylocentrotus purpuratus pancreatic triacylglycerol lipase-like (LOC105436882)	PNLIP	0.8895	0.189979	202.061	-9.98079	4.13447e-06	0.0280338	down	yes	0.271753	0.19661	0.535207	0.072239	0.029481	0.034585	2.66779	0.207052	0.108607	599.522	301.118	308.741
	TRINITY_DN4027_c0_g1	intraflagellar transport protein 122 homolog isoform X1 [Strongylocentrotus purpuratus]	IFT122	0.9958	0	3.15745	-8.30718	5.62111e-06	0.0340563	down	yes	0	0	0	0	0	0	0.410584	0.882845	0	7.83219	4.25289	5.56621

## Sheet: Suppl.Table6
Supplementary Table S6. List of all differentially expressed genes (HF vs LF) with blast annotations.
Sequence ID	Gene annotation	abbreviation	identify	expression_HF	expression_LF	log2FC(HF/LF)	pval	fdr	regulate	significant	tpm_HF1	tpm_HF2	tpm_HF3	tpm_LF1	tpm_LF2	tpm_LF3
TRINITY_DN14138_c0_g1	gelsolin-like protein 2 [Strongylocentrotus purpuratus]	GELSOLIN	97.06%	9.79688	0	9.93765	7.10154e-06	0.0367972	up	yes	13.9718	2.57906	12.8398	0	0	0
TRINITY_DN2117_c1_g1	PREDICTED: Strongylocentrotus purpuratus alpha-1 collagen (COLP1alpha)	COLP1a	0.9758	3.06298	1.76667e-05	8.26095	2.27227e-06	0.0206044	up	yes	4.48024	2.70007	2.00864	1.7e-05	1.8e-05	1.8e-05
TRINITY_DN1655_c0_g1	26S proteasome non-ATPase regulatory subunit 5 [Strongylocentrotus purpuratus]	PSMD5	0.9708	0	18.3332	-10.841	6.52482e-06	0.0367972	down	yes	0	0	0	9.1522	18.9971	26.8502
TRINITY_DN1317_c0_g1	PREDICTED: Strongylocentrotus purpuratus spectrin alpha chain, non-erythrocytic 1 (LOC580822)	SPTAN1	0.8895	0	29.0037	-11.5025	1.78662e-06	0.0206044	down	yes	0	0	0	25.307	21.7234	39.9806
TRINITY_DN324_c0_g1	PREDICTED: Strongylocentrotus purpuratus E3 ubiquitin-protein ligase MYLIP-like (LOC115925151)	MYLIP	87.67%	0	17.8299	-10.8009	6.01529e-06	0.0367972	down	yes	0	0	0	11.7633	22.7874	18.939
TRINITY_DN3672_c0_g1	pumilio homolog 2 isoform X6 [Strongylocentrotus purpuratus]	PUM2	0.9984	0	4.67474	-8.87183	8.30035e-06	0.0376327	down	yes	0	0	0	4.67571	5.94428	3.40424
TRINITY_DN6377_c0_g1	la-related protein 1B [Strongylocentrotus purpuratus]	LARP1B	97.73%	0	6.49268	-9.34489	1.90752e-06	0.0206044	down	yes	0	0	0	10.1423	3.28543	6.05031
TRINITY_DN8000_c0_g1	PREDICTED: Strongylocentrotus purpuratus eukaryotic translation initiation factor 3 subunit G (LOC586718)	EIF3G	0.9154	0	42.6939	-12.0602	1.60218e-06	0.0206044	down	yes	0	0	0	37.7698	46.4902	43.8219

## Sheet: Suppl.Table7
Supplementary Table S7. List of all differentially expressed genes (HF vs MF) with blast annotations.
Sequence ID	Gene annotation	abbreviation	identify	expression_HF	expression_MF	log2FC(HF/MF)	pval	fdr	regulate	significant	tpm_HF1	tpm_HF2	tpm_HF3	tpm_MF1	tpm_MF2	tpm_MF3
TRINITY_DN12484_c0_g1	adenosine kinase isoform X1 [Strongylocentrotus purpuratus]	ADK	0.9666	51.3368	0	12.3261	1.58704e-06	0.0307004	up	yes	9.99807	54.9877	89.0246	0	0	0
TRINITY_DN7_c2_g1	cell division cycle protein 23 homolog [Strongylocentrotus purpuratus]	CDC23	0.9983	18.3676	0	10.8437	3.5789e-06	0.0461547	up	yes	16.0296	34.356	4.71718	0	0	0
TRINITY_DN57915_c0_g1	40S ribosomal protein S15-like [Strongylocentrotus purpuratus]	RPS15	1	0.0571857	615.012	-13.1602	2.9305e-07	0.0113378	down	yes	0	0.171557	0	819.401	515.827	509.807

## Sheet: Suppl.Table8
Supplementary Table S8. List of all differentially expressed genes (LF vs MF) with blast annotations.
Sequence ID	Gene annotation	abbreviation	identify	expression_LF	expression_MF	log2FC(LF/MF)	pval	fdr	regulate	significant	tpm_LF1	tpm_LF2	tpm_LF3	tpm_MF1	tpm_MF2	tpm_MF3
TRINITY_DN4425_c1_g1	PREDICTED: Strongylocentrotus purpuratus ras-related protein Rab-2A (LOC577200)	RAB2A	0.9145	12.0717	0	10.2386	2.07494e-06	0.0204363	up	yes	10.7158	9.3645	16.1348	0	0	0
TRINITY_DN5757_c0_g1	ETS translocation variant 1 isoform X1 [Strongylocentrotus purpuratus]	ETV1	98.43%	4.95717	0	8.95628	7.48006e-06	0.0423639	up	yes	4.55504	4.64723	5.66922	0	0	0
TRINITY_DN665_c0_g1	betaine--homocysteine S-methyltransferase 1 [Strongylocentrotus purpuratus]	BHMT	96.82%	26.0299	0	11.3465	2.57741e-06	0.0204363	up	yes	12.6023	18.2494	47.2381	0	0	0
TRINITY_DN7_c2_g1	cell division cycle protein 23 homolog [Strongylocentrotus purpuratus]	CDC23	0.9983	19.7726	0	10.95	1.39449e-06	0.0204363	up	yes	24.6243	15.1573	19.5361	0	0	0
TRINITY_DN8461_c0_g1	protein CNPPD1 [Strongylocentrotus purpuratus]	CNPPD1	96.85%	17.0881	0	10.7396	9.64359e-06	0.04248	up	yes	25.2946	18.7622	7.2075	0	0	0
TRINITY_DN13356_c2_g1	nuclear pore complex protein Nup160 [Strongylocentrotus purpuratus]	NUP160	0.9744	0	83.9467	-13.0354	1.76445e-06	0.0204363	down	yes	0	0	0	63.8184	133.318	54.704
TRINITY_DN14138_c0_g1	gelsolin-like protein 2 [Strongylocentrotus purpuratus]	GELSOLIN	97.06%	0	10.1306	-9.98592	4.63004e-06	0.030593	down	yes	0	0	0	10.3095	10.024	10.0582
TRINITY_DN57915_c0_g1	40S ribosomal protein S15-like [Strongylocentrotus purpuratus]	RPS15	1	0	615.012	-15.9083	9.28291e-08	0.00368021	down	yes	0	0	0	819.401	515.827	509.807
TRINITY_DN6506_c4_g1	arginine kinase [Strongylocentrotus purpuratus]	AKS	0.9212	0	16.5763	-10.6958	9.43626e-06	0.04248	down	yes	0	0	0	12.4909	21.5492	15.6888

## Sheet: Suppl.Table9
Supplementary Table S9. List of all differentially expressed genes (HM vs LM) with blast annotations.
Sequence ID	Gene annotation	abbreviation	identify	expression_HM	expression_LM	log2FC(HM/LM)	pval	fdr	regulate	significant	tpm_HM1	tpm_HM2	tpm_HM3	tpm_LM1	tpm_LM2	tpm_LM3
TRINITY_DN11351_c0_g1	uncharacterized protein C11orf65 homolog isoform X1 [Strongylocentrotus purpuratus]	C11orf65	97.40%	10.3838	0	10.0215	1.12233e-05	0.0375663	up	yes	8.45897	14.8373	7.855	0	0	0
TRINITY_DN12683_c0_g1	max-interacting protein 1 isoform X1 [Strongylocentrotus purpuratus]	MXI1	100.00%	28.5529	0	11.4799	9.21377e-07	0.008073	up	yes	34.9683	29.7464	20.9441	0	0	0
TRINITY_DN1910_c1_g1	WD repeat-containing protein 78 [Strongylocentrotus purpuratus]	WDR78	0.982	28.0242	0	11.453	5.13759e-07	0.00687854	up	yes	24.1464	44.254	15.6721	0	0	0
TRINITY_DN1947_c0_g1	DNA damage-binding protein 2 isoform X1 [Strongylocentrotus purpuratus]	DDB2	94.87%	11.2722	0	10.1398	8.56547e-06	0.0366923	up	yes	7.04613	13.8575	12.9129	0	0	0
TRINITY_DN2060_c0_g1	uncharacterized protein LOC105436417 isoform X2 [Strongylocentrotus purpuratus]	LOC105436417	0.9807	18.8126	0	10.8782	1.36917e-06	0.00916565	up	yes	24.914	23.195	8.32864	0	0	0
TRINITY_DN2261_c0_g1	uncharacterized protein LOC100888101 [Strongylocentrotus purpuratus]	LOC100888101	96.78%	4.12643	0	8.69224	2.20537e-05	0.0470608	up	yes	2.43097	3.24126	6.70706	0	0	0
TRINITY_DN29225_c0_g1	Strongylocentrotus purpuratus tektin-4-like (LOC577210)	TEKT4	83.33%	103.649	0	13.3396	1.72514e-05	0.044982	up	yes	129.141	150.246	31.5607	0	0	0
TRINITY_DN5704_c0_g2	myotubularin-related protein 4 [Strongylocentrotus purpuratus]	MTMR4	97.95%	9.68741	0	9.92146	9.13517e-06	0.0366923	up	yes	6.8252	10.1571	12.08	0	0	0
TRINITY_DN6633_c1_g1	forkhead box protein biniou [Strongylocentrotus purpuratus]	BIN	98.90%	13.2627	0	10.3742	1.79184e-05	0.044982	up	yes	4.22111	18.4732	17.0936	0	0	0
TRINITY_DN7320_c0_g1	PREDICTED: Strongylocentrotus purpuratus polyadenylate-binding protein 2 (LOC594592)	PAB2	100.00%	8.98796	0	9.81345	1.00503e-05	0.0366984	up	yes	7.83284	5.21589	13.9152	0	0	0
TRINITY_DN7533_c0_g1	c-Myc-binding protein-like [Strongylocentrotus purpuratus]	MYCBP	100.00%	22.2113	0	11.1177	8.90129e-06	0.0366923	up	yes	21.5561	18.9877	26.0899	0	0	0
TRINITY_DN9159_c0_g1	PREDICTED: Strongylocentrotus purpuratus transitional endoplasmic reticulum ATPase (LOC763802)	VCP	92.96%	17.4731	0	10.7717	2.22615e-05	0.0470608	up	yes	30.2592	0.536212	21.6239	0	0	0
TRINITY_DN935_c0_g1	kelch repeat and BTB domain-containing protein 8 [Strongylocentrotus purpuratus]	KBTBD8	98.28%	10.3489	0	10.0167	1.73002e-05	0.044982	up	yes	6.34309	12.81	11.8938	0	0	0
TRINITY_DN11_c1_g1	oligoribonuclease, mitochondrial [Strongylocentrotus purpuratus]	REXO2	99.10%	0	21.1123	-11.0446	1.79182e-05	0.044982	down	yes	0	0	0	27.5901	19.2339	16.5129
TRINITY_DN11164_c0_g1	PREDICTED: Strongylocentrotus purpuratus protein D3 (LOC588570)	D3	95.83%	0.039715	58.2169	-10.1938	2.05509e-05	0.0470608	down	yes	0	0.119145	0	52.5472	50.4424	71.661
TRINITY_DN2525_c0_g1	coiled-coil domain-containing protein 85C-A isoform X1 [Strongylocentrotus purpuratus]	CCDC85CA	97.21%	0	7.77594	-9.60473	5.56602e-06	0.0319378	down	yes	0	0	0	8.56199	8.05384	6.71198
TRINITY_DN5830_c0_g1	protein HGV2-like isoform X3 [Strongylocentrotus purpuratus]	HGV2	96.93%	0	3.91441	-8.61633	2.43312e-05	0.0488644	down	yes	0	0	0	5.28475	4.12368	2.33481
TRINITY_DN6252_c0_g1	probable inactive 1-aminocyclopropane-1-carboxylate synthase-like protein 2 [Strongylocentrotus purpuratus]	ACCSL	0.9674	0	53.5736	-12.3876	1.00495e-06	0.008073	down	yes	0	0	0	97.2035	29.4603	34.0569
TRINITY_DN7542_c13_g1	ankyrin-3-like [Strongylocentrotus purpuratus]	ANK3	0.8274	0	37.4683	-11.8718	1.34276e-07	0.00539332	down	yes	0	0	0	31.7179	27.1078	53.5792
TRINITY_DN8439_c0_g1	dynein regulatory complex subunit 7 [Strongylocentrotus purpuratus]	DRC7	99.42%	0	39.9484	-11.9643	4.34376e-07	0.00687854	down	yes	0	0	0	44.8568	45.0942	29.8942

## Sheet: Suppl.Table10
Supplementary Table S10. List of all differentially expressed genes (LM vs MM) with blast annotations.
Sequence ID	Gene annotation	abbreviation	identify	expression_LM	expression_MM	log2FC(LM/MM)	pval	fdr	regulate	significant	tpm_LM1	tpm_LM2	tpm_LM3	tpm_MM1	tpm_MM2	tpm_MM3
TRINITY_DN10129_c0_g1	sperm-tail PG-rich repeat-containing protein 2 [Strongylocentrotus purpuratus]	STPG2	99.15%	19.7627	0	10.9493	1.64924e-05	0.0385886	up	yes	3.82536	49.725	5.73777	0	0	0
TRINITY_DN10957_c0_g1	testis-specific serine/threonine-protein kinase 1-like [Strongylocentrotus purpuratus]	TSSK1B	99.04%	94.2252	0	13.202	2.85463e-06	0.0109296	up	yes	57.4591	86.7724	138.444	0	0	0
TRINITY_DN1377_c0_g1	uncharacterized protein LOC100894098 [Strongylocentrotus purpuratus]	LOC100894098	92.46%	16.1995	0	10.6626	1.07917e-05	0.0284064	up	yes	12.0674	27.1157	9.41543	0	0	0
TRINITY_DN1480_c2_g1	cation channel sperm-associated protein 1 [Strongylocentrotus purpuratus]	CATSPER1	98.10%	61.4305	0	12.585	2.211e-06	0.0109296	up	yes	110.942	40.3855	32.9639	0	0	0
TRINITY_DN1626_c1_g1	dynein heavy chain 3, axonemal isoform X2 [Strongylocentrotus purpuratus]	DNAH3	0.9946	13.245	3.33333e-06	10.3718	4.09608e-06	0.0143759	up	yes	7.8816	5.9331	25.9202	4e-06	3e-06	3e-06
TRINITY_DN2083_c0_g1	serine/threonine-protein kinase DCLK1 isoform X1 [Strongylocentrotus purpuratus]	DCLK1	98.43%	52.358	0	12.3545	2.57426e-06	0.0109296	up	yes	14.0272	101.942	41.1051	0	0	0
TRINITY_DN2525_c0_g1	coiled-coil domain-containing protein 85C-A isoform X1 [Strongylocentrotus purpuratus]	CCDC85CA	97.21%	7.77594	0	9.60473	2.57153e-05	0.0492285	up	yes	8.56199	8.05384	6.71198	0	0	0
TRINITY_DN3046_c0_g1	negative elongation factor C/D isoform X1 [Strongylocentrotus purpuratus]	NELFCD	99.83%	20.7334	0	11.0184	8.56084e-06	0.0271969	up	yes	22.8169	21.5404	17.8429	0	0	0
TRINITY_DN3138_c2_g2	uncharacterized protein LOC121424790 [Lytechinus variegatus]	LOC121424790	82.26%	10.4413	0	10.0295	2.47912e-05	0.0492285	up	yes	17.6625	5.1898	8.47159	0	0	0
TRINITY_DN3162_c0_g1	uncharacterized protein LOC105441704 [Strongylocentrotus purpuratus]	LOC105441704	81.37%	47.7863	0	12.2227	2.75844e-06	0.0109296	up	yes	27.6238	39.9287	75.8064	0	0	0
TRINITY_DN3310_c0_g1	PREDICTED: Strongylocentrotus purpuratus pancreatic triacylglycerol lipase-like (LOC105436882)	PNLIP	0.8895	403.127	0.045435	12.8282	5.61708e-07	0.0102005	up	yes	599.522	301.118	308.741	0.072239	0.029481	0.034585
TRINITY_DN4207_c0_g1	putative uncharacterized protein DDB_G0271606 [Acanthaster planci]	G0271606	0.4355	197.551	0	14.27	4.42274e-07	0.0102005	up	yes	42.4812	380.443	169.729	0	0	0
TRINITY_DN472_c0_g1	uncharacterized protein LOC105438945 [Strongylocentrotus purpuratus]	LOC105438945	87.36%	103.265	0	13.3342	2.30653e-06	0.0109296	up	yes	20.4642	106.621	182.711	0	0	0
TRINITY_DN5334_c0_g1	nicolin-1 [Strongylocentrotus purpuratus]	NICN1	96.86%	139.259	0	13.7656	7.26601e-07	0.0102005	up	yes	70.076	232.382	115.319	0	0	0
TRINITY_DN5440_c0_g1	nephrocystin-1 isoform X2 [Strongylocentrotus purpuratus]	NPHP1	97.73%	21.0573	0	11.0408	2.29012e-05	0.0482253	up	yes	31.4519	14.1565	17.5634	0	0	0
TRINITY_DN5969_c0_g1	uncharacterized protein LOC100890897 isoform X1 [Strongylocentrotus purpuratus]	LOC100890897	91.47%	8.65527	0	9.7591	1.07141e-05	0.0284064	up	yes	10.2693	7.33646	8.36002	0	0	0
TRINITY_DN655_c1_g1	serine/arginine repetitive matrix protein 2 [Strongylocentrotus purpuratus]	SRRM2	89.13%	135.338	0.0169797	12.2925	9.04067e-06	0.0271969	up	yes	202.317	108.175	95.5218	0	0	0.050939
TRINITY_DN7542_c13_g1	ankyrin-3-like [Strongylocentrotus purpuratus]	ANK3	0.8274	37.4683	0	11.8718	1.19645e-06	0.0109296	up	yes	31.7179	27.1078	53.5792	0	0	0
TRINITY_DN761_c0_g1	PREDICTED: hemicentin-1-like [Branchiostoma belcheri]	HMCN1	36.26%	57.9739	0	12.5014	2.04973e-06	0.0109296	up	yes	57.1307	55.4022	61.3888	0	0	0
TRINITY_DN8041_c1_g1	uncharacterized protein LOC756624 isoform X5 [Strongylocentrotus purpuratus]	LOC756624	94.50%	64.107	0	12.6465	1.34853e-06	0.0109296	up	yes	29.9243	65.8887	96.5081	0	0	0
TRINITY_DN9945_c0_g1	aspartate aminotransferase, mitochondrial [Strongylocentrotus purpuratus]	ASP1	98.38%	38.7083	0	11.9188	1.88233e-05	0.0417244	up	yes	36.0672	31.7659	48.2918	0	0	0
TRINITY_DN9159_c0_g1	PREDICTED: Strongylocentrotus purpuratus transitional endoplasmic reticulum ATPase (LOC763802)	VCP	92.96%	0	23.0877	-11.1735	1.37824e-05	0.0341447	down	yes	0	0	0	4.22948	43.6449	21.3888
